# Supplementary material for: Alu Elements as Novel Regulators of Gene Expression in Type 1 Diabetes Susceptibility Genes?
Source: PubMed Central journal article supplement (PMC4584318; doi:10.3390/genes6030577), 2015-07-13
Supplement: genes-06-00577-s001.pdf [file genes-06-00577-s001.pdf]

## Supplementary Tables

**Table S1.** Percentage sequence covered by repeats for sequences including coding (CDS) sequences, intronic sequences and UTRs (untranslated regions) of T1D genes.

| <b>T1D</b>                                   |                  |            |                |               |               |
|----------------------------------------------|------------------|------------|----------------|---------------|---------------|
| <b>Repeat Class</b>                          | <b>T1D Genes</b> | <b>CDS</b> | <b>Introns</b> | <b>5'UTRs</b> | <b>3'UTRs</b> |
| SINEs                                        | 18.07%           | 0.19%      | 19.88%         | 3.66%         | 4.87%         |
| LINEs                                        | 15.44%           | 0.13%      | 16.08%         | 1.17%         | 2.17%         |
| LTRs                                         | 4.85%            | 0.04%      | 4.29%          | 0.46%         | 1.74%         |
| DNA elements                                 | 3.29%            | 0.03%      | 3.74%          | 0.35%         | 1.14%         |
| Unclassified                                 | 0.24%            | 0%         | 0.33%          | 0.05%         | 0%            |
| Small RNA                                    | 0.08%            | 0%         | 0.05%          | 0%            | 0%            |
| Satellites                                   | 0.03%            | 0%         | 0.01%          | 0%            | 0%            |
| Simple repeats                               | 1.10%            | 0.84%      | 1.10%          | 2.91%         | 1.17%         |
| Low complexity regions                       | 0.19%            | 0.17%      | 0.16%          | 0.40%         | 0.19%         |
| Total percentage sequence covered by repeats | 43.30%           | 1.40%      | 45.64%         | 9%            | 11.28%        |

**Table S2.** T1D associated SNPs within Alu elements of T1D genes. The T1D GWAS SNPs were retrieved from Barrett *et al.*, 2009 with a *p*-value cutoff < 0.01. The T1D genes with highly significant GWAS *p*-values are highlighted in red. The orientation of the Alu elements is depicted with + for sense Alus and C for antisense Alus.

| Chr   | SNP Position | SNP        | Alu Start | Alu End  | ALU Length | Alu Direction | Alu Subfamily | Ensembl ID      | Gene Name        | Strand | GENE TYPE         | <i>p</i> -Value (Barrett <i>et al.</i> , 2009[1]) |
|-------|--------------|------------|-----------|----------|------------|---------------|---------------|-----------------|------------------|--------|-------------------|---------------------------------------------------|
| chr10 | 6192811      | rs11256997 | 6192679   | 6192988  | 310        | +             | AluSx1        | ENSG00000170525 | PFKFB3           | 1      | protein coding    | 1.70E-03                                          |
| chr10 | 6471816      | rs11596750 | 6471681   | 6471904  | 224        | +             | AluJb         | ENSG00000065675 | PRKCQ            | -1     | protein coding    | 2.00E-06                                          |
| chr19 | 10537268     | rs1352426  | 10537265  | 10537560 | 296        | +             | AluSz6        | ENSG00000065989 | PDE4A            | 1      | protein coding    | 6.80E-03                                          |
| chr16 | 11293711     | rs248848   | 11293652  | 11293937 | 286        | C             | AluSg7        | ENSG00000263033 | RP11-396B14.2    | 1      | lincRNA           | 1.20E-03                                          |
| chr7  | 26908972     | rs213527   | 26908970  | 26909256 | 287        | C             | AluSx         | ENSG0000005020  | SKAP2            | -1     | protein coding    | 2.00E-06                                          |
| chr6  | 29971548     | rs6905157  | 29971299  | 29971586 | 288        | +             | AluJb         | ENSG00000204623 | ZNRD1-AS1        | -1     | antisense         | 1.50E-10                                          |
| chr6  | 30302600     | rs3778624  | 30302514  | 30302799 | 286        | C             | AluJr4        | ENSG00000204599 | TRIM39           | 1      | protein coding    | 2.40E-04                                          |
| chr6  | 30302600     | rs3778624  | 30302514  | 30302799 | 286        | C             | AluJr4        | ENSG00000248167 | TRIM39-RPP21     | 1      | protein coding    | 2.40E-04                                          |
| chr6  | 30434900     | rs7747873  | 30434643  | 30434912 | 270        | C             | AluSz         | ENSG00000229068 | TMPOP1           | 1      | pseudogene        | 3.10E-07                                          |
| chr6  | 30735105     | rs12210947 | 30734802  | 30735111 | 310        | C             | AluJb         | ENSG00000228022 | HCG20            | 1      | lincRNA           | 5.60E-39                                          |
| chr6  | 30913458     | rs3132581  | 30913450  | 30913752 | 303        | +             | AluSc8        | ENSG00000168631 | DPCR1            | 1      | protein coding    | 2.40E-85                                          |
| chr6  | 31091992     | rs3094204  | 31091985  | 31092027 | 43         | +             | FAM           | ENSG00000204540 | PSORS1C1         | 1      | protein coding    | 5.20E-03                                          |
| chr6  | 31673436     | rs9267546  | 31673135  | 31673443 | 309        | +             | AluSc         | ENSG00000204422 | XXbac-BPG32J3.20 | -1     | protein coding    | 1.20E-27                                          |
| chr6  | 33150268     | rs7382464  | 33150207  | 33150501 | 295        | C             | AluSz         | ENSG00000204248 | COL11A2          | -1     | protein coding    | 1.30E-10                                          |
| chr12 | 56564811     | rs7960225  | 56564509  | 56564814 | 306        | +             | AluSg         | ENSG00000139613 | SMARCC2          | -1     | protein coding    | 1.20E-21                                          |
| chr12 | 56564811     | rs7960225  | 56564509  | 56564814 | 306        | +             | AluSg         | ENSG00000258199 | RP11-977G19.5    | -1     | sense overlapping | 1.20E-21                                          |

**Table S3.** Background UTR dataset. Characteristics of human transcriptome-wide UTRs based on Ensembl v75 (GrCh37).

| All UTRs                         |        |        |        |
|----------------------------------|--------|--------|--------|
| Category                         | 5'UTRs | 3'UTRs | Total  |
| Total UTRs                       | 80,296 | 72,248 |        |
| Total Genes                      | 19,574 | 19,639 | 19,969 |
| Average UTR per gene             | 4.1    | 3.67   |        |
| Genes with single transcripts    | 4968   | 4930   |        |
| Genes having both 5' and 3' UTRs |        |        | 19,244 |
| Average length of UTRs           | 240    | 948    |        |
| Max length of UTRs               | 14,960 | 22,552 |        |

**Table S4.** Percentage of sequence covered by repeats in background UTR dataset.

| All UTRs                                        |        |        |
|-------------------------------------------------|--------|--------|
| Repeat Class                                    | 5'UTRs | 3'UTRs |
| SINEs                                           | 3.20%  | 5.14%  |
| LINEs                                           | 1.50%  | 2.63%  |
| LTRs                                            | 1.04%  | 1.49%  |
| DNA elements                                    | 0.55%  | 1.33%  |
| Unclassified                                    | 0.03%  | 0.04%  |
| Small RNA                                       | 0.01%  | 0.03%  |
| Satellites                                      | 0.05%  | 0.01%  |
| Simple repeats                                  | 2.69%  | 1%     |
| Low complexity regions                          | 0.51%  | 0.18%  |
| Total percentage of sequence covered by repeats | 9.58%  | 11.85% |

**Table S5.** Distribution of Alu repeats in the background UTR dataset.

| All UTRs                             |                     |                    |
|--------------------------------------|---------------------|--------------------|
| Category                             | 5'UTRs              | 3'UTRs             |
| Total UTRs                           | 80,296              | 72,248             |
| Total bases in UTRs                  | 19,314,465          | 68,496,749         |
| Total number of UTRs having repeats  | 16,390              | 25,840             |
| Total number of UTRs having Alu's    | 2400                | 8029               |
| Total number of UTRs having SINEs    | 3969                | 11,104             |
| Total number of repeats in UTRs      | 21,679              | 55,353             |
| Total number of Alu's in UTRs        | 2709                | 11,942             |
| Total number of SINEs in UTRs        | 4669                | 17,669             |
| Percentage of UTRs having repeats    | 20.41%              | 35.76%             |
| Percentage of UTRs having Alu's      | 3%                  | 11.11%             |
| Percentage of UTRs having SINEs      | 4.94%               | 15.36%             |
| One Alu element occurrence per       | 7129 bases (7.1 kb) | 5735 bases (5.7kb) |
| Percentage sequence covered by Alus  | 2.08%               | 4.07%              |
| Percentage sequence covered by SINEs | 3.20%               | 5.14%              |

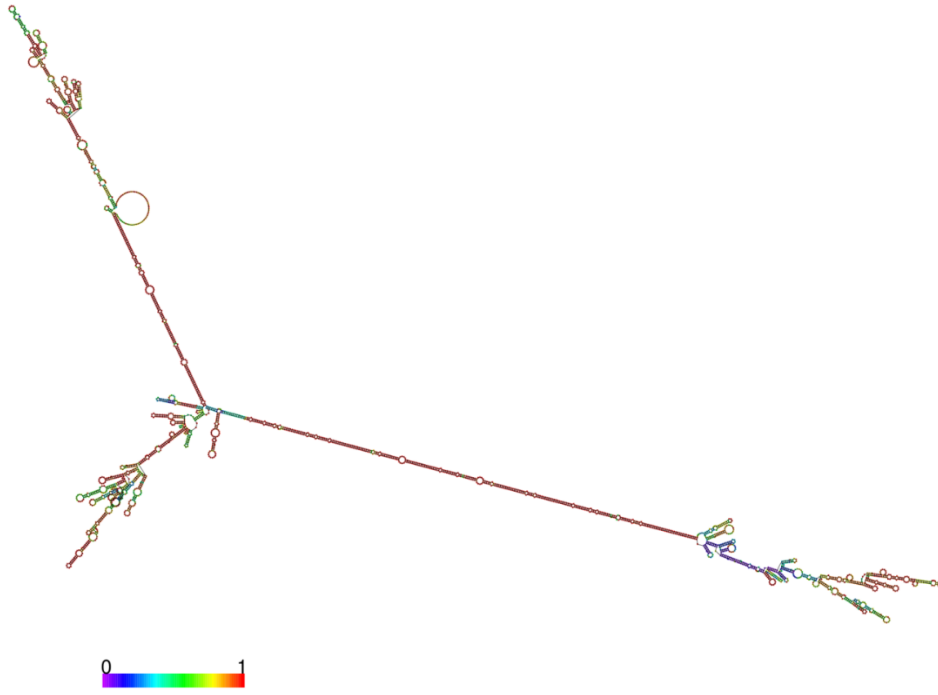

(A)

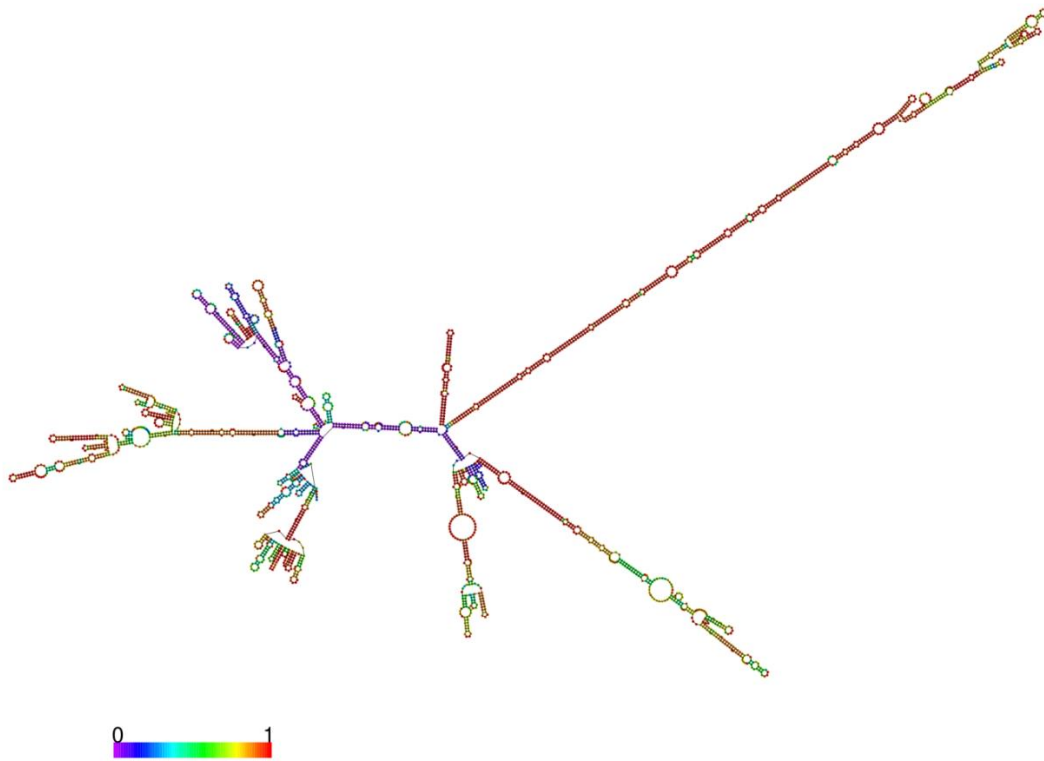

(B)

Figure S1. Cont.

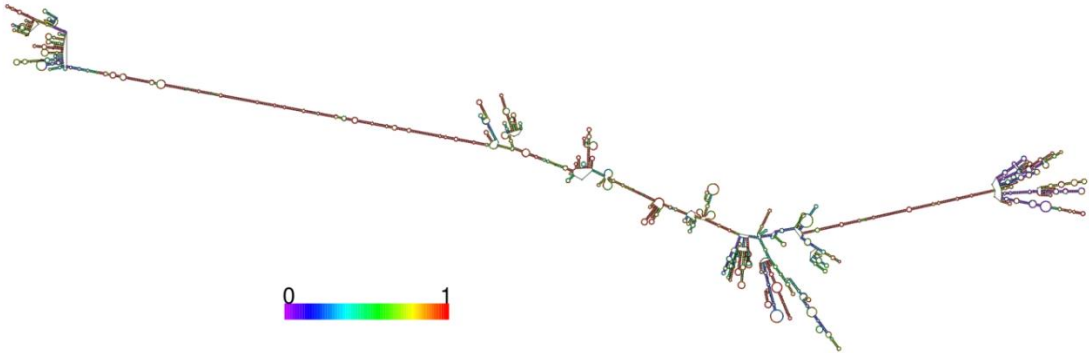

(C)

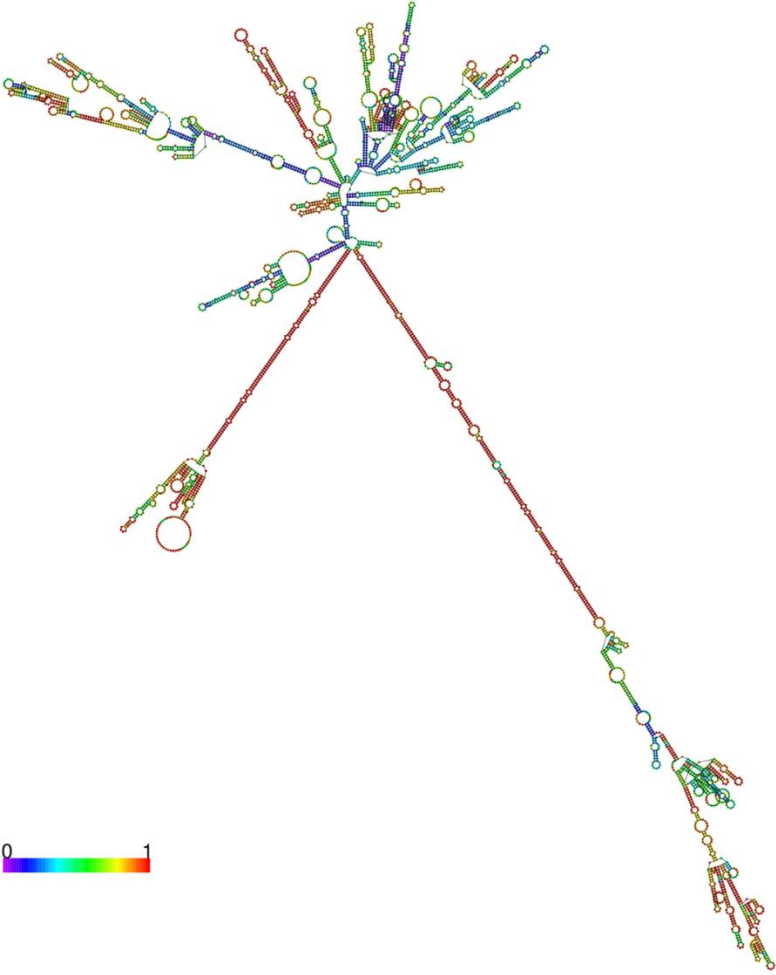

(D)

Figure S1. Cont.

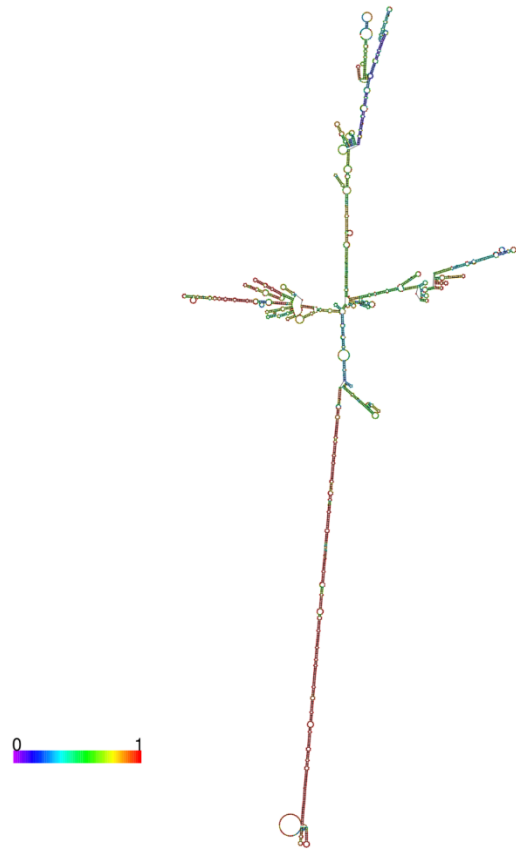

(E)

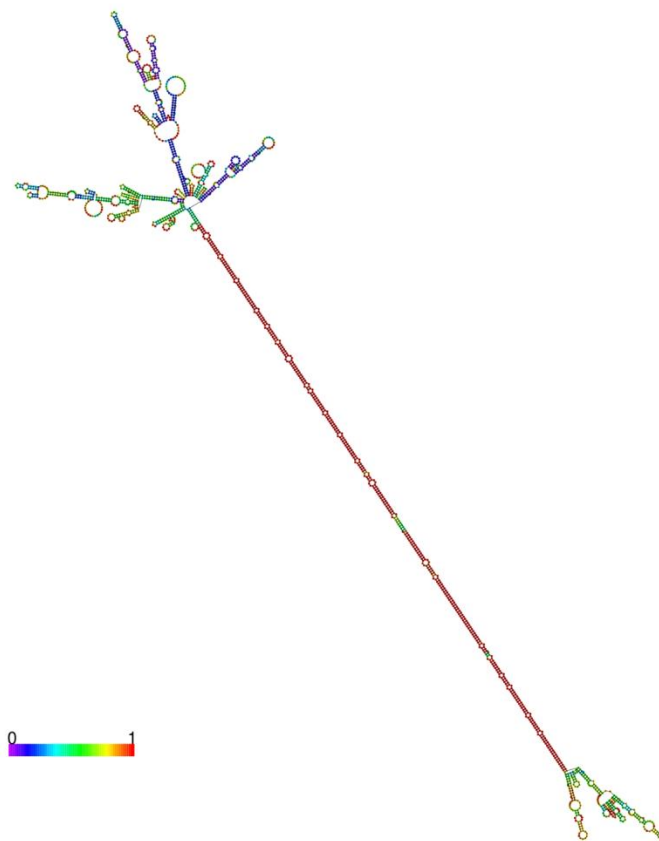

(F)

Figure S1. Cont.

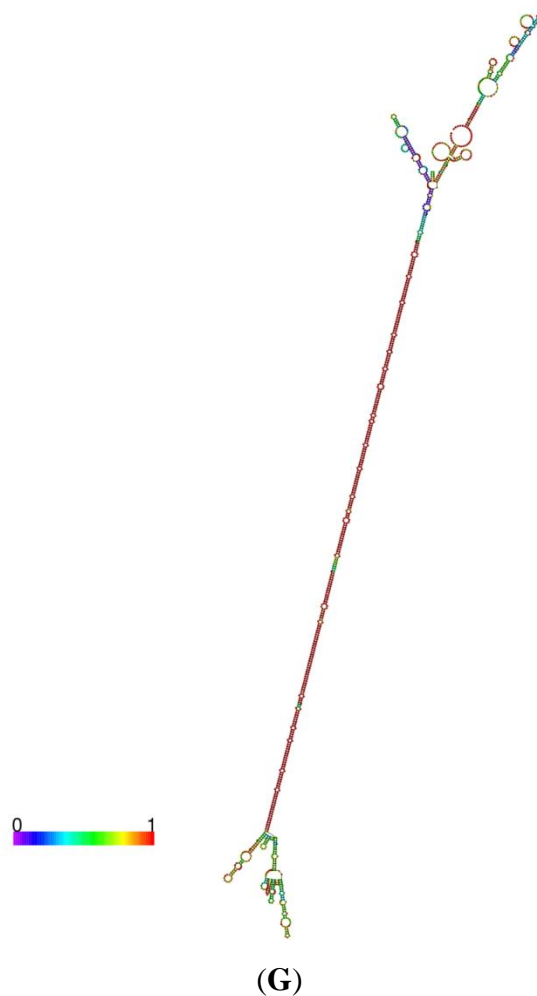

**Figure S1.** The dsRNA duplex formed by IRAlus within 3'UTRs of T1D mRNAs. The secondary structures were predicted by RNAfold. The color scale represents base-pairing probability with values ranging from 0 to 1 and red color indicating strong base-pair probability. (A) Secondary structure of *TSPAN31* 3'UTR (ENST00000547992); (B) Secondary structure of *THOC5* 3'UTR (ENST00000490103); (C) Secondary structure of *RSPH3* 3'UTR (ENST00000367069); (D) Secondary structure of *TMEM170A* 3'UTR (ENST00000357613); (E) Secondary structure of *HLA-DOA* 3'UTR (ENST00000229829); (F) Secondary structure of *CSNK2B-LY6G5B-1181* 3'UTR (ENST00000375880); (G) Secondary structure of *LY6G5B* 3'UTR (ENST00000375864).

### Reference

1. Barrett, J.C.; Clayton, D.G.; Concannon, P.; Akolkar, B.; Cooper, J.D.; Erlich, H.A.; Julier, C.; Morahan, G.; Nerup, J.; Nierras, C.; *et al.* Genome-wide association study and meta-analysis find that over 40 loci affect risk of type 1 diabetes. *Nat. Genet.* **2009**, *41*, 703–707.
